# Supplementary material
Source: Research Square preprint supplement (doi:10.21203/rs.3.rs-8157766/v1)
Supplement: Supplementary file 1 [file e9496724ad9434b616249426.docx]

**Valorisation of brewers’ spent grain via alkaline pretreatment for protein concentrate and poly(3-hydroxybutyrate) production**

**Katiana Filippia,Chrysanthi Argeitia, Eleni Anna Kouveliotia, Eleni Stylianoua, Olga Psakia, Dimitrios Ladakisb, Apostolis Koutinasa,* and Anestis Vlysidisc**

a Department of Food Science and Human Nutrition, Agricultural University of Athens, Iera Odos 75, 118 55 Athens, Greece

b Department of Agricultural Development, Agri-Food and Natural Resources Management, National and Kapodistrian University of Athens, Evripos Campus, 344 00 Psachna, Evia, Greece

c School of Chemical Engineering, National Technical University of Athens, Iroon Polytechneiou 9, Zografou, Athens, Greece

* Corresponding author, email: [akoutinas@aua.gr](mailto:akoutinas@aua.gr)

**Journal: Biomass Conversion and Biorefinery**

**Table S1:** ANOVA results and parameter estimates for Y1

| **Source** | **Degrees of freedom** | **Sum of squares** | **Mean square** | ***F*-value** | ***P* > *F*** |
| --- | --- | --- | --- | --- | --- |
| Model | 5 | 6110.9 | 1222.2 | 28.594 | <0.0004 |
| Error | 6 | 256.5 | 42.7 |  |  |
| Lack of Fit | 3 | 216.7 | 72.2 | 5.449 | 0.099 |
| Pure Error | 3 | 39.8 | 13.3 |  |  |
| Total | 6 | 256.5 |  |  |  |
| **Parameters** | **Estimate** | **Standard error** | ***t* Ratio** | ***Prob* > *|t|*** |  |
| Intercept | 59.64 | 3.27 | 18.25 | <.0001 |  |
| X1 | 23.62 | 2.31 | 10.22 | <.0001 |  |
| X2 | 7.71 | 2.31 | 3.34 | 0.016 |  |
| X12 | -13.50 | 2.58 | -5.22 | 0.002 |  |
| X22 | -3.23 | 2.58 | -1.25 | 0.258 |  |
| X1 X2 | -1.26 | 3.27 | -0.38 | 0.714 |  |

**Table S2:** ANOVA results and parameter estimates for Y2

| **Source** | **Degrees of freedom** | **Sum of squares** | **Mean square** | ***F*-value** | ***P* > *F*** |
| --- | --- | --- | --- | --- | --- |
| Model | 5 | 5453.7 | 1090.7 | 266.7 | <.0001 |
| Error | 6 | 24.5 | 4.1 |  |  |
| Lack of Fit | 3 | 21.8 | 7.3 | 7.96 | 0.06 |
| Pure Error | 3 | 2.7 | 0.9 |  |  |
| Total | 6 | 24.5 |  |  |  |
| **Parameters** | **Estimate** | **Standard error** | ***t* Ratio** | ***Prob* > *|t|*** |  |
| Intercept | 59.042 | 1 | 58.39 | <.0001 |  |
| X1 | 22.638 | 0.715068 | 31.66 | <.0001 |  |
| X2 | 9.112 | 0.715068 | 12.74 | <.0001 |  |
| X12 | -10.238 | 0.799579 | -12.8 | <.0001 |  |
| X22 | -2.301 | 0.799579 | -2.88 | 0.0281 |  |
| X1 X2 | -2.200 | 1 | -2.18 | 0.0725 |  |

**Table S3:** ANOVA results and parameter estimates for Y3

| **Source** | **Degrees of freedom** | **Sum of squares** | **Mean square** | ***F*-value** | ***P* > *F*** |
| --- | --- | --- | --- | --- | --- |
| Model | 5 | 1087.5 | 217.5 | 9.327 | <.0085 |
| Error | 6 | 139.9 | 23.3 |  |  |
| Lack of Fit | 3 | 133.9 | 44.6 | 22.53 | 0.015 |
| Pure Error | 3 | 5.9 | 1.98 |  |  |
| Total | 6 | 139.9 |  |  |  |
| **Parameters** | **Estimate** | **Standard error** | ***t* Ratio** | ***Prob* > *|t|*** |  |
| Intercept | 13.627 | 2.415 | 5.64 | 0.0013 |  |
| X1 | 10.755 | 1.707 | 6.30 | 0.0007 |  |
| X2 | 3.525 | 1.707 | 2.06 | 0.0845 |  |
| X12 | 1.145 | 1.909 | 0.60 | 0.5706 |  |
| X22 | 1.995 | 1.909 | 1.05 | 0.3362 |  |
| X1 X2 | 2.905 | 2.415 | 1.20 | 0.2742 |  |
